# Supplementary material
Source: ML conference proceedings conference paper supplement (https://openreview.net/forum?id=lhLEGeBC-ru)
Supplement: supplementary_material [file attachment]

## A Computing AFAC points

In this appendix we prove Theorem 4, which states that AFAC points can be computed in polynomial time.

We focus on the constrained optimization problem  $(P_{\text{con}})$  throughout this appendix. We will later need the following lemma, which gives a simple bound on the magnitude of the Lagrange multipliers of  $(P_{\text{con}})$ .

**Lemma 4.** *Let  $(y, \lambda)$  be such that  $\|\nabla_y L(y, \lambda)\| \leq \varepsilon_1$ . If  $\varrho$ -LICQ holds at  $y$ , then  $\|\lambda\| \leq \varrho^{-1}(\varepsilon_1 + \|\nabla f(y)\|)$ .*

*Proof.* Let  $J := \nabla h(y)$ . Since  $\nabla L(y, \lambda) = \nabla f(y) + J^T \lambda$ , and  $J$  is full rank, then  $\lambda = (J^\dagger)^T (\nabla L(y, \lambda) - \nabla f(y))$ , where  $J^\dagger$  is the pseudo-inverse of  $J$ . Hence  $\|\lambda\| \leq \varrho^{-1}(\varepsilon_1 + \|\nabla f(y)\|)$ .  $\square$

### A.1 The algorithm

Cartis et al. [14] proposed a method for computing  $q$ -th order critical points for  $q \in \{1, 2, 3\}$ . However, they use a nonstandard notion of criticality which is not easy to translate into our setting. We present here a slight modification of this algorithm that accommodates more general criticality conditions.

Consider the least squares functions

$$\nu(y) := \|h(y)\|^2, \quad \mu(t, y) := (f(y) - t)^2 + \|h(y)\|^2.$$

We denote  $\mu_t = \mu(t, \cdot)$  the function obtained by fixing the value of  $t$ . Algorithm 1 below is a variant of the method from [14]. It consists of two phases. The first phase attempts to find an approximately feasible solution through the unconstrained problem  $\min_y \nu(y)$ . If successful, the second phase minimizes  $f$  while preserving feasibility. To do so, it solves a sequence of problems  $\min_y \mu(t_k, y)$ , where the values  $\{t_k\}_{k \geq 0}$  are decreasing.

---

**Algorithm 1** Constrained optimization algorithm based on [14]

---

**Input:** Initial point  $y_0 \in \mathbb{R}^n$ , tolerances  $\epsilon_0 \in \mathbb{R}_+$ ,  $\epsilon \in \mathbb{R}_+^q$ , constant  $\delta \in (0, 1)$ .

**Output:** A point  $y \in \mathbb{R}^n$  and a number  $t \leq f(y)$ .

PHASE I

$y_1 := \text{local min}_y \nu(y)$  starting with  $y_0$   
 $t_0 := f(y_1)$   
**if**  $\nu(y_1) > (\delta \epsilon_0)^2$  **then return**  $(y_1, t_0)$

PHASE II

$t_1 := f(y_1) - (\epsilon_0^2 - \nu(y_1))^{1/2}$   
**for**  $k = 2, 3, 4, \dots$  **do**  
 $y_k := \text{local min}_y \mu(t_{k-1}, y)$  starting with  $y_{k-1}$   
**if**  $\mu(t_{k-1}, y_k) < (\delta \epsilon_0)^2$  **then** ▷ case (a)  
 $t_k := f(y_k) - (\epsilon_0^2 - \nu(y_k))^{1/2}$   
**if**  $\chi(\mu_{t_k}, y_k) \leq \epsilon$  **then return**  $(y_k, t_k)$   
**if**  $\mu(t_{k-1}, y_k) \geq (\delta \epsilon_0)^2$  &  $f(y_k) < t_{k-1}$  **then** ▷ case (b)  
 $t_k := 2f(y_k) - t_{k-1}$   
**if**  $\chi(\mu_{t_k}, y_k) \leq \epsilon$  **then return**  $(y_k, t_k)$   
**if**  $\mu(t_{k-1}, y_k) \geq (\delta \epsilon_0)^2$  &  $f(y_k) \geq t_{k-1}$  **then** ▷ case (c)  
**return**  $(y_k, t_k)$ , with  $t_k := t_{k-1}$

---

Algorithm 1 relies on an *inner method* for solving the unconstrained problem  $\min_y \psi(y)$ , where  $\psi$  is either  $\nu$  or  $\mu_t = \mu(t, \cdot)$ . Given  $\epsilon = (\epsilon_1, \dots, \epsilon_q) \in \mathbb{R}_+^q$ , the inner method looks for a point  $y$  such that  $\chi(\psi, y) \leq \epsilon$ , for some *criticality measure*  $\chi = (\chi_1, \dots, \chi_q)$ . We assume that the  $j$ -th component  $\chi_j(\psi, y)$  only involves derivatives  $\{\nabla^d \psi(y)\}_{d \leq j}$  up to order  $j$ . For instance, the AC-criticality condition from (1) corresponds to the case

$$\chi^{\text{AC}}(\psi, y) := (\|\nabla \psi(y)\|, -\min \text{eig}(\nabla^2 \psi(y))). \quad (10)$$

Given an initial point  $y^0$  and tolerances  $\epsilon \in \mathbb{R}_+^q$ , the inner method produces iterates  $\{y^i\}_{i=1}^N$ . We assume that the final point  $y^N$  achieves these tolerances and that the objective function decreases proportionately to  $N$ :

$$\chi(\psi, y^N) \leq \epsilon \quad \text{and} \quad \psi(y^0) - \psi(y^N) \geq N \kappa_\psi p(\epsilon), \quad (11)$$

for some  $\kappa_\psi > 0$  and some function  $p$ . Hence, the number of iterations  $N$  is proportional to  $p(\epsilon)^{-1}$ .

The next theorem provides guarantees for Algorithm 1. Our proof closely follows that of [14, Thm.4.5] but has the advantage that it applies to a general class of criticality measures, as opposed to [14], which relies on a particular nonstandard measure of criticality. However our complexity is larger than in [14] by a factor of  $\epsilon_0^{-1}$ .

**Theorem 8.** *Assume that:*

- *The inner method satisfies (11) for the function  $\nu$  with constant  $\kappa_\nu$ .*
- *The inner method satisfies (11) for the function  $\mu_t$ , and the constant  $\kappa_\mu$  is independent of  $t$ .*
- *There exists  $\beta > \epsilon_0$  and  $f_{\text{low}} \in \mathbb{R}$  such that  $f(y) \geq f_{\text{low}}$  for all  $y \in \mathfrak{M}_\beta$ , where  $\mathfrak{M}_\beta := \{y : \|h(y)\| \leq \beta\}$ .*

*Then the total number of inner iterations made in Algorithm 1 is at most*

$$p(\epsilon)^{-1} (\kappa_\nu^{-1} \nu(y_0) + \epsilon_0 \kappa_\mu^{-1} (1-\delta)^{-1} (f(y_1) - f_{\text{low}} + \beta)), \quad (12)$$

*and the algorithm returns a pair  $(y, t)$  such that:*

$$\text{either} \quad t < f(y), \quad \|h(y)\| \leq \epsilon_0, \quad \chi(\mu_t, y) \leq \epsilon, \quad (13a)$$

$$\text{or} \quad t = f(y), \quad \|h(y)\| > \delta \epsilon_0, \quad \chi_1(\nu, y) \leq \epsilon_1. \quad (13b)$$

## A.2 Proof of Theorem 8

Let  $K$  be the number of outer iterations of Algorithm 1. Consider the sets of indices:

$$A := \{1\} \cup \{k : 2 \leq k \leq K \text{ and case (a) is applied}\},$$

$$B := \{k : 2 \leq k \leq K \text{ and case (b) is applied}\}.$$

The following lemma gives a few properties of Algorithm 1. Its proof is identical to [14, Lem.3.1].

**Lemma 5.** *If the algorithm reaches Phase II, then:*

$$\nu(y_k) \leq \mu(t_k, y_k) \leq \epsilon_0^2, \quad 0 \leq f(y_k) - t_k \leq \epsilon_0, \quad \text{for } k \geq 1, \quad (14)$$

$$\mu(t_k, y_k) = \epsilon_0^2, \quad t_{k-1} - t_k \geq (1-\delta)\epsilon_0, \quad \text{for } k \in A, \quad (15)$$

$$\mu(t_k, y_k) = \mu(t_{k-1}, y_k), \quad t_{k-1} > t_k, \quad \text{for } k \in B, \quad (16)$$

$$\mu(t_k, y_k) \geq (\delta \epsilon_0)^2, \quad \chi(\mu_{t_k}, y_k) \leq \epsilon, \quad \text{for } k = K. \quad (17)$$

Let  $(y, t)$  be the output of Algorithm 1, and let us show (13). Assume first that the algorithm terminates in Phase I. Then  $y$  is a local minimum of  $\nu$ ,  $\nu(y) > (\delta \epsilon_0)^2$ , and  $t = f(y)$ . Hence (13b) holds. Assume now that the algorithm terminates in Phase II. By (14) and (17), we have

$$t \leq f(y), \quad (\delta \epsilon_0)^2 \leq \mu_t(y) \leq \epsilon_0^2, \quad \chi(\mu_t, y) \leq \epsilon.$$

If  $f(y) < t$  then  $\|h(y)\| \leq \sqrt{\mu_t(y)} \leq \epsilon_0$ , so (13a) holds. Consider now the case that  $f(y) = t$ . Note that  $\mu_t(y) = \nu(y)$ ,  $\nabla \mu_t(y) = \nabla \nu(y)$ . Then  $\chi_1(\mu_t, y) = \chi_1(\nu, y)$ , as they only involve derivatives up to order 1. Since  $\|h(y)\| = \sqrt{\mu_t(y)} \geq \delta \epsilon_0$ , then (13b) holds.

We proceed to show that the number of inner iterations is bounded by (12). Each outer iteration  $k$  of Algorithm 1 calls the inner method once. Let  $N_k$  be the number of inner iterations made in this call. The total number of inner iterations is  $\sum_{k=1}^K N_k$ .

We first analyze Phase I. The inner method is applied to the problem  $\min_y \nu(y)$ , starting with  $y_0$  and terminating with  $y_1$ . By (11), we have

$$\nu(y_0) \geq \nu(y_0) - \nu(y_1) \geq N_1 \kappa_\nu p(\epsilon).$$

It follows that  $N_1 \leq \nu(y_0)/\kappa_\nu p(\epsilon)$ .

We proceed to Phase II. For each  $a \in A$ , let  $n(a)$  be the next integer that lies in  $A$ . For the largest  $a \in A$  we define  $n(a) := K$ , where  $K$  is the final iteration. We can group the indices  $k \geq 2$  as follows:

$$\{2, 3, \dots, K\} = \bigcup_{a \in A} K_a, \quad K_a := \{a+1, a+2, \dots, n(a)\}.$$

We will show that for any  $a \in A$  we have that

$$N(K_a) := \sum_{k \in K_a} N_k \leq \epsilon_0^2 / \kappa_\mu p(\epsilon). \quad (18)$$

Consider an iteration  $k \in K_a$ . The inner method is applied to  $\min_y \mu(t_{k-1}, y)$ , starting with  $y_{k-1}$  and terminating with  $y_k$ . By (11), we have

$$\mu(t_{k-1}, y_{k-1}) - \mu(t_{k-1}, y_k) \geq N_k \kappa_\mu p(\epsilon).$$

Observe that  $K_a \setminus \{n(a)\} \subset B$ . By (16), we have

$$\mu(t_{k-1}, y_k) = \mu(t_k, y_k) \quad \text{for } k \in K_a \setminus \{n(a)\}.$$

Also note that  $\mu(t_a, y_a) = \epsilon_0^2$  by (15). Therefore,

$$\begin{aligned} \epsilon_0^2 &\geq \mu(t_a, y_a) - \mu(t_{n(a)-1}, y_{n(a)}) \\ &= \sum_{k \in K_a} \mu(t_{k-1}, y_{k-1}) - \mu(t_{k-1}, y_k) \geq \sum_{k \in K_a} N_k \kappa_\mu p(\epsilon). \end{aligned}$$

By rearranging the above inequality we get (18).

Let us now upper bound the cardinality of  $A$ . By (15) and (16) we have that  $t_{k-1} - t_k$  is at least  $(1-\delta)\epsilon_0$  for  $k \in A$ , and is positive for  $k \in B$ . Also note that  $t_0 = f(y_1)$  and  $t_K \geq f(y_K) - \epsilon_0 \geq f_{\text{low}} - \beta$  by (14). Then

$$f(y_1) - f_{\text{low}} + \beta \geq t_0 - t_K = \sum_{k=1}^K (t_{k-1} - t_k) \geq \sum_{k \in A} (t_{k-1} - t_k) \geq |A| (1-\delta)\epsilon_0,$$

and hence  $|A| \leq (f(y_1) - f_{\text{low}} + \beta) / ((1-\delta)\epsilon_0)$ .

Combining everything, we derive

$$\sum_{k=1}^K N_k \leq N_1 + |A| \cdot \max_{a \in A} N(K_a) \leq \frac{\nu(y_0)}{\kappa_\nu p(\epsilon)} + \frac{f(y_1) - f_{\text{low}} + \beta}{(1-\delta)\epsilon_0} \cdot \frac{\epsilon_0^2}{\kappa_\mu p(\epsilon)},$$

which is equal to (12).

### A.3 Proof of Theorem 4

We finally show that AFAC points can be computed in polynomial time. Let  $\varepsilon_0, \varepsilon_1, \varepsilon_2, \gamma, R_\lambda$  be as in the statement of Theorem 4. We consider Algorithm 1 with parameters

$$\begin{aligned} \delta &:= 1/2, \quad q := 2, \quad \epsilon := (\epsilon_1, \epsilon_2), \\ \epsilon_0 &:= \varepsilon_0, \quad \epsilon_1 := R_\lambda^{-1} \varepsilon_0 \varepsilon_1, \quad \epsilon_2 := \frac{1}{2} R_\lambda^{-1} \varepsilon_0 \varepsilon_2. \end{aligned}$$

For the inner method we use the ARC algorithm from Theorem 3, using the criticality measure (10). Algorithm 1 returns a pair  $(y, t)$ . The associated multiplier is  $\lambda := (f(y) - t)^{-1} h(y) \in \mathbb{R}^m$ , which is defined only if  $f(y) \neq t$ .

In order to apply Theorem 8, we have to check that the functions  $\nu$  and  $\mu_t = \mu(t, \cdot)$  are smooth enough so that the inner algorithm satisfies (11).

**Lemma 6** ([14, Lem.4.1]). *Assume that  $\{\nabla^j f\}_{j=0}^q, \{\nabla^j h\}_{j=0}^q$  are uniformly bounded and Lipschitz continuous on a set  $D \subset \mathbb{R}^n$ . Then*

- (i)  $\{\nabla^j \nu\}_{j=0}^q$  are uniformly bounded and Lipschitz continuous on  $D$ .
- (ii)  $\{\nabla^j \mu_t\}_{j=0}^q$  are uniformly bounded and Lipschitz continuous on  $D \cap B_t$ , with  $B_t := \{y : |f(y) - t| \leq 1\}$ , and the constants are independent of  $t$ .

The above lemma shows that  $\nu$  is smooth on  $\mathfrak{M}_\beta$  and  $\mu_t$  is smooth on  $\mathfrak{M}_\beta \cap B_t$ , with  $B_t := \{y : |f(y) - t| \leq 1\}$ . Note that all points  $y_k$  produced by Algorithm 1 lie in  $\mathfrak{M}_\beta \cap B_t$  because of (14). Since  $\nu, \mu_t$  are sufficiently smooth, we can apply Theorem 3 (see also [15]). We conclude that the inner method satisfies (11) with

$$p(\epsilon) = \min\{\epsilon_1^2, \epsilon_2^3\} = \Omega(\min\{\epsilon_0^2 \epsilon_1^2, \epsilon_0^3 \epsilon_2^3\}).$$

Hence, by Theorem 8, the total number of inner iterations is  $O(p(\epsilon)^{-1}) = O(\max\{\epsilon_0^{-2} \epsilon_1^{-2}, \epsilon_0^{-3} \epsilon_2^{-3}\})$ . Since each inner iteration requires  $O(1)$  function evaluations (see Theorem 3), then the total number of function evaluations has the same order of magnitude.

Let us see that the conditions (2) hold. Let  $(y, t)$  be the output of Algorithm 1. By Theorem 8, this pair satisfies either (13a) or (13b). Let us see that (13b) cannot occur. Assume that

$$\|h(y)\| > \epsilon_0/2, \quad \|\nabla \nu(y)\| \leq \epsilon_1.$$

Observe that  $\|h(y)\| \leq \epsilon_0 \leq \beta$  by (14), and hence  $\varrho$ -LICQ holds at  $y$ . Then

$$\varrho \epsilon_0 < 2 \varrho \|h(y)\| \leq 2 \|h(y)^T \nabla h(y)\| = \|\nabla \nu(y)\| \leq \epsilon_1.$$

Also note that

$$R_\lambda^{-1} \leq \frac{1}{2} \varrho (1 + L_f)^{-1} \leq \frac{1}{2} \varrho,$$

$$\epsilon_1 / \epsilon_0 = R_\lambda^{-1} \epsilon_1 \leq \frac{1}{2} \varrho \epsilon_1 \leq \frac{1}{2} \varrho.$$

The last two equations give a contradiction.

Then the output  $(y, t)$  satisfies (13a). Hence,  $t < f(y)$  and

$$\|h(y)\| \leq \epsilon_0, \quad \|\nabla \mu_t(y)\| \leq \epsilon_1, \quad \nabla^2 \mu_t(y) \succeq -\epsilon_2 I_n.$$

Let  $\alpha := (f(y) - t)^{-1}$ , so that  $\lambda = \alpha h(y)$ . It can be checked that  $\alpha^2 \mu_t(y) = \|(1, \lambda)\|^2$ . Note that  $\mu_t(y) \geq (\epsilon_0/2)^2$  by (17), and hence

$$\alpha = \mu_t(y)^{-1/2} \|(1, \lambda)\| \leq 2 \epsilon_0^{-1} \|(1, \lambda)\|.$$

The Lagrangian function  $L(y, \lambda) = f(y) + \lambda \cdot h(y)$  is closely related to  $\mu_t(y)$ . A simple calculation gives that

$$\begin{aligned} \nabla L(y, \lambda) &= \alpha \cdot \frac{1}{2} \nabla \mu_t(y), \\ \nabla^2 L(y, \lambda) &= \alpha \left( \frac{1}{2} \nabla^2 \mu_t(y) - \tilde{J}^T \tilde{J} \right), \end{aligned} \tag{19}$$

where  $\tilde{J} := \begin{pmatrix} \nabla f(y) \\ \nabla h(y) \end{pmatrix}$  is the augmented Jacobian.

We proceed to verify (2a). We already have that  $\|h(y)\| \leq \epsilon_0$ . Note that

$$\|\nabla L(y, \lambda)\| = \frac{1}{2} \alpha \|\nabla \mu_t(y)\| \leq \epsilon_0^{-1} \|(1, \lambda)\| \epsilon_1 = R_\lambda^{-1} \|(1, \lambda)\| \epsilon_1. \tag{20}$$

We claim that  $\|(1, \lambda)\| \leq R_\lambda$ . By Lemma 4 and  $R_\lambda^{-1} \leq \varrho/2$ ,  $\epsilon_1 \leq 1$ , we have

$$\|\lambda\| \leq \varrho^{-1} (R_\lambda^{-1} \epsilon_1 \|(1, \lambda)\| + \|\nabla f(y)\|) \leq \frac{1}{2} (1 + \|\lambda\|) + \varrho^{-1} L_f.$$

It follows that  $\|\lambda\| \leq 1 + 2\varrho^{-1} L_f = R_\lambda - 1$  and hence  $\|(1, \lambda)\| \leq R_\lambda$ , as we claimed. Then  $\|\nabla L(y, \lambda)\| \leq \epsilon_1$  by (20).

We now verify (2b). Let  $u \in \mathbb{R}^n$  of unit norm such that  $\|Ju\| \leq \gamma$ , where  $J := \nabla h(y)$ . We need to show that  $u^T \nabla^2 L(y, \lambda) u \geq -\epsilon_2$ . By (19), we have

$$u^T \nabla^2 L(y, \lambda) u = \alpha \left( \frac{1}{2} u^T \nabla^2 \mu_t(y) u - \|\tilde{J}u\|^2 \right). \tag{21}$$

Note that  $u^T \nabla^2 \mu_t(y) u \geq -\epsilon_2 = -\frac{1}{2} R_\lambda^{-1} \epsilon_0 \epsilon_2$ . We bound  $\|\tilde{J}u\|$  next:

$$\tilde{J} = \begin{pmatrix} \nabla f(y) \\ \nabla h(y) \end{pmatrix} = \begin{pmatrix} \nabla L(y, \lambda) \\ 0 \end{pmatrix} + \begin{pmatrix} -\lambda^T J \\ J \end{pmatrix},$$

$$\|\tilde{J}u\| \leq \|\nabla L(y, \lambda)\| + \|(1, \lambda)\| \|Ju\| \leq \epsilon_1 + \gamma \|(1, \lambda)\| \leq \frac{1}{2} (R_\lambda^{-1} \epsilon_0 \epsilon_2)^{1/2},$$

where we used that  $\epsilon_1$  and  $\gamma R_\lambda$  are at most  $\frac{1}{4} (R_\lambda^{-1} \epsilon_0 \epsilon_2)^{1/2}$  by (3). Hence

$$\alpha \left( \frac{1}{2} u^T \nabla^2 \mu_t(y) u - \|\tilde{J}u\|^2 \right) \geq -(2\epsilon_0^{-1} \|(1, \lambda)\|) \cdot \left( \frac{1}{2} R_\lambda^{-1} \epsilon_0 \epsilon_2 \right) \geq -\epsilon_2.$$

Together with (21), we get that  $u^T \nabla^2 L(y, \lambda) u \geq -\epsilon_2$ .

## B Proofs from Section 4

*Proof of Lemma 3.* Let  $L(X) := f(X) - \bar{S} \bullet X$ , with  $\bar{S} := S(\bar{X})$ . This is a convex function with  $\nabla L(\bar{X}) = 0$ , so  $\bar{X}$  is its global minimum. Note that

$$\begin{aligned} f(X) &= L(X) + \bar{S} \bullet X \geq L(X) - (\varepsilon_2 I_n) \bullet X \geq L(X) - \varepsilon_2 \|X\| \sqrt{n}, \\ L(\bar{X}) &= f(\bar{X}) - \bar{S} \bullet \bar{X} \geq f(\bar{X}) - \|\bar{S}\bar{X}\|_* \geq f(\bar{X}) - \varepsilon_1 \sqrt{n}. \end{aligned}$$

Since  $L(X) \geq L(\bar{X})$ , the result follows from the above equations.  $\square$

The next lemma is an analogue of Lemma 2.

**Lemma 7.** *Let  $Y$  be an  $(\varepsilon_1, \varepsilon_2)$ -AC point of  $(BM_{ls})$ . If  $\sigma_p(Y) \leq \sqrt{\varepsilon_2}/R_A$ , then  $YY^T$  is  $\varepsilon'$ -approximately optimal for  $(SDP_{ls})$ , with  $\varepsilon' := (0, R_Y \varepsilon_1, 5\varepsilon_2)$ .*

*Proof.* Let  $Y$  satisfy (9), and let us show that  $YY^T$  satisfies (8). The first-order condition is easy to check. We proceed to show that  $u^T S(X)u \geq -\varepsilon'_2$  for any unit vector  $u \in \mathbb{R}^n$ . Let  $z \in \mathbb{R}^p$  be a unit vector such that  $\|Yz\| = \sigma_p(Y)$ . The matrix  $U := uz^T$  satisfies  $\|U\| = 1$  and  $\|UY^T\| \leq \|u\| \|Yz\| = \sigma_p(Y)$ . Then  $\|\mathcal{A}(UY^T)\| \leq \sqrt{\varepsilon_2}$  and by (9b) we have

$$u^T S(X)u = S(YY^T) \bullet UU^T \geq -\varepsilon_2 - 4\|\mathcal{A}(UY^T)\|^2 \geq -5\varepsilon_2. \quad \square$$

*Proof of Proposition 2.* As  $\mathcal{A} \in \mathcal{A}_\varepsilon$ , there is a spurious  $\varepsilon$ -AC point  $Y$ . By Lemma 7, we must have  $\sigma_p(Y) > \sqrt{\varepsilon_2}/R_A$ . Note that  $\|S(YY^T)Y\| \leq \varepsilon_1$ . Together with (6), we conclude that  $S(YY^T) \in \text{tube}_\delta(\mathbb{S}_{n-p}^n)$ . Let  $\lambda := 2(\mathcal{A}(YY^T) - b)$ . Note that  $\|\lambda\| > 2\varepsilon_0$  and

$$\|\lambda\| = 2\|\mathcal{A}(YY^T) - b\| \leq 2(\|\mathcal{A}\| \|Y\|^2 + \|b\|) \leq R_\lambda.$$

Then  $\lambda \in D_\lambda$  and  $\mathcal{A}^*(\lambda) = S(YY^T) \in \text{tube}_\delta(\mathbb{S}_{n-p}^n)$ .  $\square$

*Proof of Theorem 7.* The result in Proposition 2 can be expressed as:

$$\mathcal{A}_\varepsilon \subset \{\mathcal{A} \in (\mathbb{S}^n)^m : 0 \in \text{tube}_\delta(\mathbb{S}_{n-p}^n) + \mathcal{A}^*(D_\lambda)\},$$

which is closer to the formula in Proposition 1. Consider an  $\varepsilon$ -net  $\mathcal{N}$  of  $D_\lambda$ , where  $\varepsilon := \delta/R_A$ . It suffices to take  $(3R_\lambda/\varepsilon)^m = (3\kappa/\delta)^m$  points for the  $\varepsilon$ -net. A reasoning similar to (7) gives

$$\begin{aligned} \mathcal{A}_\varepsilon &\subset \{\mathcal{A} \in (\mathbb{S}^n)^m : 0 \in \text{tube}_{2\delta}(\mathbb{S}_{n-p}^n) + \mathcal{A}^*(\mathcal{N})\} \\ &= \bigcup_{\ell \in \mathcal{N}} \{\mathcal{A} \in (\mathbb{S}^n)^m : \mathcal{A}^*(\ell) \in \text{tube}_{2\delta}(\mathbb{S}_{n-p}^n)\}. \end{aligned}$$

Let  $\ell \in \mathcal{N}$ , and consider the linear map

$$\phi_\ell : (\mathbb{S}^n)^m \rightarrow \mathbb{S}^n, \quad \mathcal{A} \mapsto \mathcal{A}^*(\ell).$$

This is a surjective map. Moreover, the scaled map  $\frac{1}{\|\ell\|} \phi_\ell$  gives an isometry  $(\ker \phi_\ell)^\perp \cong \mathbb{S}^n$ . It follows that

$$\phi_\ell(\mathcal{A}) \in \text{tube}_{2\delta}(\mathbb{S}_{n-p}^n) \iff \mathcal{A} \in \text{tube}_{2\delta/\|\ell\|}(\phi_\ell^{-1}(\mathbb{S}_{n-p}^n)).$$

Since  $\|\ell\| \geq 2\varepsilon_0$ , we conclude that

$$\mathcal{A}_\varepsilon \subset \bigcup_{\ell \in \mathcal{N}} \text{tube}_{\delta/\varepsilon_0}(V_\ell), \quad \text{with } V_\ell := \phi_\ell^{-1}(\mathbb{S}_{n-p}^n).$$

The final part of the proof is similar to the one in Theorem 5. The variety  $V_\ell$  is a cylinder over  $\mathbb{S}_{n-p}^n$ , so it has the same codimension  $\tau(p)$  and degree  $n-p+1$  as  $\mathbb{S}_{n-p}^n$ . The ambient space is  $(\mathbb{S}^n)^m$ , of dimension  $\tau(n)m$ . Using the union bound and Theorem 6, we get

$$\Pr[\mathcal{A} \in \mathcal{A}_\varepsilon] < \#\mathcal{N} \cdot \Pr[\mathcal{A} \in \text{tube}_{\delta/\varepsilon_0}(V_\ell)] < (3\kappa/\delta)^m \cdot 4e (2n^3 m \delta / \sigma \varepsilon_0)^{\tau(p)}. \quad \square$$

## C Explicit complexity estimates

In this section we provide explicit complexity estimates for Theorems 1 and 2. We first introduce some notation. Consider constants  $\alpha \geq \beta > 0$  and sets  $\mathfrak{M}_\alpha \supset \mathfrak{M}_\beta$ , where  $\mathfrak{M}_t := \{Y : \|\mathcal{A}(YY^T) - b\| \leq t\}$ . We assume that  $\beta$  is small enough so that  $\varrho$ -LICQ holds globally on  $\mathfrak{M}_\beta$ . On the other hand,  $\alpha > 0$  is sufficiently large so that a point  $Y_0 \in \mathfrak{M}_\alpha$  is always known. We further assume that  $\mathfrak{M}_\alpha$  is compact. This is satisfied, for instance, when the feasible set of (SDP) is compact and satisfies Slater's condition, as shown next.

**Lemma 8.** *Assume that the set  $\{X : \mathcal{A}(X) = b, X \succeq 0\}$  is compact and satisfies Slater's condition (i.e.,  $\exists X : \mathcal{A}(X) = b, X \succ 0$ ). Then  $\mathfrak{M}_t$  is compact for any  $t \geq 0$ .*

*Proof.* Consider the SDP  $\max\{I \bullet X : \mathcal{A}(X) = b, X \succeq 0\}$  and its dual  $\min\{b^T \lambda : \mathcal{A}^*(\lambda) \succeq I\}$ . Let  $R_0^2$  be the primal optimal value, which is finite by compactness. Strong duality holds by Slater's condition. So the dual optimum is attained at some  $\bar{\lambda}$ , and  $\mathcal{A}^*(\bar{\lambda}) \succeq I$ ,  $b^T \bar{\lambda} = R_0^2$ . Given  $Y \in \mathfrak{M}_t$ ,

$$\|Y\|^2 = I \bullet YY^T \leq \mathcal{A}^*(\bar{\lambda}) \bullet YY^T = \bar{\lambda} \cdot \mathcal{A}(YY^T) = \bar{\lambda} \cdot b + \bar{\lambda} \cdot (\mathcal{A}(YY^T) - b) \leq R_0^2 + t\|\bar{\lambda}\|.$$

We conclude that  $\mathfrak{M}_t$  is contained in a ball of radius  $(R_0^2 + t\|\bar{\lambda}\|)^{1/2}$ .  $\square$

Notice that a suitable value  $\alpha$  can be obtained from an arbitrary point  $Y_0 \in \mathbb{R}^{n \times p}$ . On the other hand,  $\beta$  should be  $\Omega(\varrho_{\min})$ , where  $\varrho_{\min}$  is the smallest LICQ constant among all feasible points  $Y \in \mathfrak{M}_0$ .

### C.1 Solving (SDP)

Assume that an approximately feasible solution  $Y_0$  is known. Consider the following setting:

- $p$  satisfies  $\tau(p) \geq (1+\eta)m + \eta t$  for some given constants  $\eta, t \in \mathbb{R}_+$ .
- $\mathcal{A}, b$  are fixed and  $C$  is uniformly distributed on a ball  $\mathbf{B}_\sigma(\bar{C})$ .
- $\exists \beta \in \mathbb{R}_+$  such that:  $\mathfrak{M}_\beta$  is compact, a point  $Y_0 \in \mathfrak{M}_\beta$  is known, and  $\varrho$ -LICQ holds on  $\mathfrak{M}_\beta$ .
- $R_Y, L_f \in \mathbb{R}_+$  are constants that bound  $\|Y\|$  and  $\|CY\|$ , for  $Y \in \mathfrak{M}_\beta$ .
- (BM) is solved with the method from Theorem 4 initialized at  $Y_0$ .

The next theorem shows that the Burer-Monteiro method solves (SDP) in polynomial time with high probability.

**Theorem 9.** *Let  $\rho \in (0, 1]$  arbitrary, and let*

$$\varepsilon_0 := \gamma := \epsilon, \quad \varepsilon_1 := \epsilon^2, \quad \varepsilon_2 := 16 R_\lambda^3 \epsilon, \\ \text{with } \epsilon := K^{-1} \rho (\sigma/4n^3)^{1+1/\eta},$$

where  $R_\lambda$  and  $K$  are the problem dependent constants

$$R_\lambda := 2 + 2\varrho^{-1} L_f, \quad K := \|\mathcal{A}\| (3\kappa)^{1/\eta}, \quad \kappa := R_\lambda \|\mathcal{A}\|.$$

The algorithm from Theorem 4 returns a pair  $(Y, \lambda)$  after  $O(\epsilon^{-6})$  function evaluations. With probability at least  $1 - O(\sigma/n^3)^t$ , the pair  $(YY^T, \lambda)$  is  $(\epsilon, \epsilon^2 R_Y, 16 R_\lambda^3 \epsilon)$ -approximately optimal for (SDP).

*Proof.* The smoothness assumptions in Theorem 4 are satisfied since  $\mathfrak{M}_\beta$  is compact. Then  $(Y, \lambda)$  is an  $(\epsilon, \gamma)$ -AFAC pair with  $\|\lambda\| \leq R_\lambda$ . Note that

$$\delta := \varepsilon_1 \|\mathcal{A}\| / \gamma = \epsilon \|\mathcal{A}\| \leq (1/3\kappa)^{1/\eta} (\sigma/2en^3)^{1+1/\eta}$$

is as in Corollary 1. Hence  $(YY^T, \lambda)$  is  $(\varepsilon_0, \varepsilon_1 R_Y, \varepsilon_2)$ -approximately optimal for (SDP) with probability  $1 - O(\sigma/n^3)^t$ .  $\square$

The above theorem shows that  $YY^T$  obtained is approximately optimal for the perturbed problem (SDP) with high probability. Let  $(\overline{SDP})$  denote the SDP problem in which we use the unperturbed cost matrix  $\bar{C}$ . We can also show that  $YY^T$  is also approximately optimal for  $(\overline{SDP})$ .

**Corollary 3.** *Consider the setup of Theorem 9. With probability at least  $1 - O(\sigma/n^3)^t$ , the pair  $(YY^T, \lambda)$  is  $(\epsilon''_0, \epsilon''_1, \epsilon''_2)$ -approximately optimal for  $(\overline{SDP})$ , where  $\epsilon''_0, \epsilon''_1, \epsilon''_2 = O(\sigma)$ .*

*Proof.* Let  $X := YY^T$ . We know that  $(X, \lambda)$  is  $(\varepsilon'_0, \varepsilon'_1, \varepsilon'_2)$ -approximately optimal for  $(SDP)$  with high probability. Let  $S := C - \mathcal{A}^*(\lambda)$ ,  $\bar{S} := \bar{C} - \bar{\mathcal{A}}^*(\lambda)$  be the slack matrices for  $(SDP)$  and  $(\overline{SDP})$ . Observe that

$$\|\mathcal{A}(X) - b\| \leq \varepsilon'_0 \leq O(\sigma), \quad (22)$$

$$\|\bar{S}X\| \leq \|SX\| + \|(\bar{S} - S)X\| \leq \varepsilon'_1 + \sigma\|X\| \leq O(\sigma), \quad (23)$$

$$\bar{S} \succeq S - \|\bar{S} - S\|I_n \succeq -(\varepsilon'_2 + \sigma)I_n \succeq -O(\sigma)I_n. \quad (24)$$

So the optimality conditions of  $(\overline{SDP})$  hold with  $\varepsilon''_0, \varepsilon''_1, \varepsilon''_2 = O(\sigma)$ .  $\square$

## C.2 Solving $(SDP_{ls})$

Consider the following setting:

- $p$  satisfies  $\tau(p) \geq (1+\eta)m + \eta t$  for some given constants  $\eta, t \in \mathbb{R}_+$ .
- $b$  is fixed and  $\mathcal{A}$  is uniformly distributed on a ball  $\mathbf{B}_\sigma(\bar{\mathcal{A}})$ .
- $\exists \alpha \in \mathbb{R}_+$  and a matrix  $Y_0$  such that  $\mathfrak{M}_\alpha$  is compact and  $Y_0 \in \mathfrak{M}_\alpha$ .
- $R_Y \in \mathbb{R}_+$  is a constant that bounds  $\|Y\|$ , for  $Y \in \mathfrak{M}_\alpha$ .
- $(BM_{ls})$  is solved with the method from Theorem 3 initialized at  $Y_0$ .

**Theorem 10.** Let  $\rho \in (0, 1]$  arbitrary, and let

$$\varepsilon_1 := \varepsilon^{3/2}, \quad \varepsilon_2 := \varepsilon, \quad \varepsilon := K^{-1} (\rho \sigma^2 / 2n^3 m)^{1+1/\eta},$$

where  $K := R_A (3\kappa)^{1/\eta}$ , expressed in terms of

$$\kappa := 2(R_A R_Y^2 + \|b\|)R_A, \quad R_A := \|\bar{\mathcal{A}}\| + \sigma.$$

The algorithm from Theorem 3 returns a point  $Y$  after  $O(\varepsilon^{-3})$  function evaluations. With probability at least  $1 - O(\sigma^2/n^3 m)^t$ , we have that  $YY^T$  is  $(\rho\sigma, \varepsilon^{3/2}R_Y, 5\varepsilon)$ -approximately optimal for  $(SDP_{ls})$ .

*Proof.* The smoothness assumptions in Theorem 3 are satisfied since  $\mathfrak{M}_\alpha$  is compact. Therefore  $Y$  is an  $(\varepsilon_1, \varepsilon_2)$ -AC point. Note that

$$\delta := \varepsilon_1 R_A / \sqrt{\varepsilon_2} = \varepsilon R_A = (1/3\kappa)^{1/\eta} (\rho \sigma^2 / 2n^3 m)^{1+1/\eta}$$

is as in Corollary 2. Hence  $YY^T$  is  $(\rho\sigma, \varepsilon_1 R_Y, 5\varepsilon_2)$ -approximately optimal for  $(SDP_{ls})$  with probability  $1 - O(\sigma^2/n^3 m)^t$ .  $\square$

*Remark.* The above theorem holds even if the optimal value of  $(SDP_{ls})$  is nonzero. In the special case that the optimal value is zero, then by Lemma 3 we have that

$$\|\mathcal{A}(YY^T) - b\| \leq \max\{\varepsilon'_0, n^{1/4}(\varepsilon'_1 + \varepsilon'_2 R_Y)^{1/2}\},$$

where  $\varepsilon'_0 = \rho\sigma, \varepsilon'_1 = \varepsilon^{3/2}R_Y, \varepsilon'_2 = 5\varepsilon$  are the optimality constants from Theorem 10.

Let  $(\overline{SDP}_{ls})$  denote the instance of problem  $(SDP_{ls})$  in which we use the unperturbed constraints  $\bar{\mathcal{A}}$ . We next show that  $YY^T$  is also approximately optimal for  $(\overline{SDP}_{ls})$ .

**Corollary 4.** Consider the setup of Theorem 10. With probability at least  $1 - O(\sigma^2/n^3 m)^t$ , the matrix  $YY^T$  is  $(\varepsilon''_0, \varepsilon''_1, \varepsilon''_2)$ -approximately optimal for  $(\overline{SDP}_{ls})$ , where  $\varepsilon''_0, \varepsilon''_1, \varepsilon''_2 = O(\sigma)$ .

*Proof.* We know that the matrix  $X := YY^T$  is  $(\varepsilon'_0, \varepsilon'_1, \varepsilon'_2)$ -approximately optimal for  $(SDP)$  with high probability. There are two cases. The first case is that  $\|\mathcal{A}(X) - b\| \leq \varepsilon'_0$ , which implies that

$$\|\bar{\mathcal{A}}(X) - b\| \leq \|\mathcal{A}(X) - b\| + \|(\bar{\mathcal{A}} - \mathcal{A})X\| \leq \varepsilon'_0 + \sigma\|X\| \leq O(\sigma).$$

This means that  $\varepsilon''_0 = O(\sigma)$ . Consider the variables:

$$\lambda := 2(\mathcal{A}(X) - b), \quad S := \mathcal{A}^*(\lambda),$$

$$\bar{\lambda} := 2(\bar{\mathcal{A}}(X) - b), \quad \bar{S} := \bar{\mathcal{A}}^*(\bar{\lambda}).$$

The second case is that  $\|SX\| \leq \varepsilon_1, S \succeq -\varepsilon_2 I_n$ . Note that

$$\|\bar{\lambda} - \lambda\| \leq 2\|\bar{\mathcal{A}} - \mathcal{A}\|\|X\| \leq O(\sigma),$$

$$\|\bar{S} - S\| \leq \|\bar{\mathcal{A}}^*(\bar{\lambda} - \lambda)\| + \|(\bar{\mathcal{A}}^* - \mathcal{A}^*)\lambda\| \leq O(\sigma).$$

From (23) and (24) we get that  $\|\bar{S}X\| \leq O(\sigma)$  and  $\bar{S} \succeq -O(\sigma)I_n$ . So the optimality conditions of  $(\overline{SDP}_{ls})$  hold with  $\varepsilon''_0, \varepsilon''_1, \varepsilon''_2 = O(\sigma)$ .  $\square$
